# Supplementary material
Source: Royal Society of Chemistry journal article supplement (doi:10.1039/d5fb00795j)
Supplement: d5fb00795j1.pdf [file d5fb00795j1.pdf]

### Supplementary information

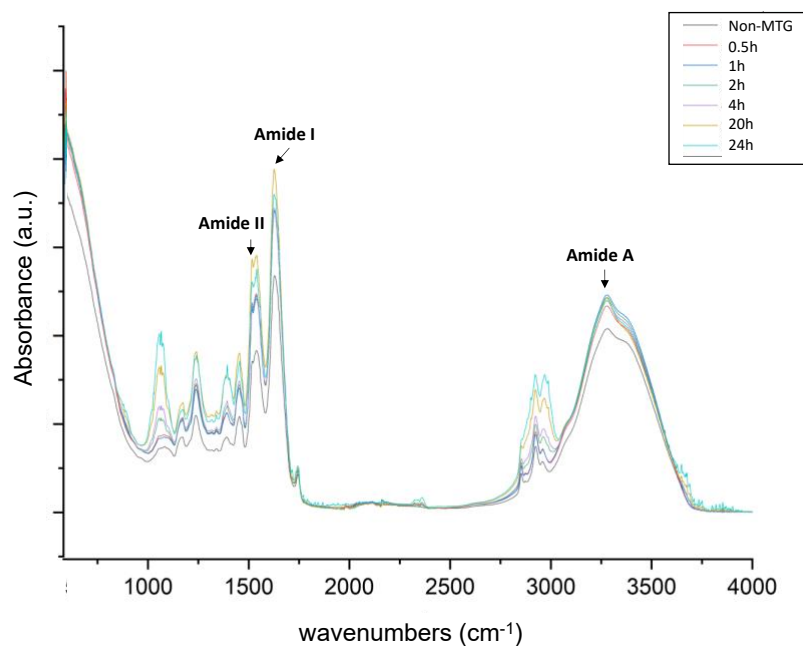

**Fig. S1** FTIR spectra (650-4000 cm<sup>-1</sup>) of BSFL protein dispersions subjected to MTG treatment for different durations

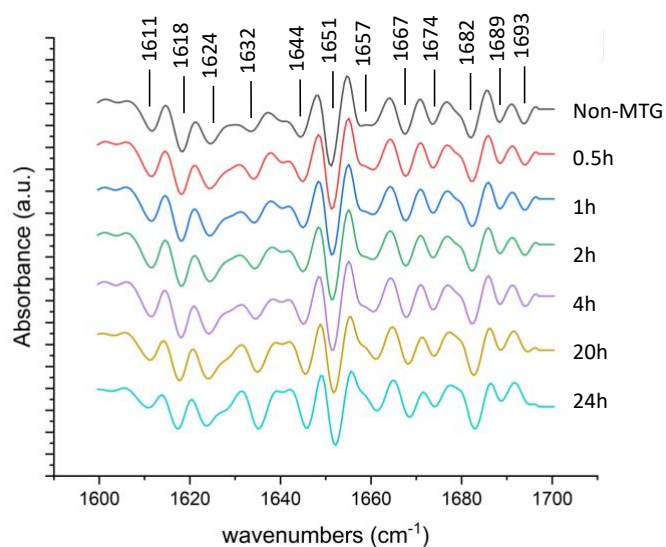

**Fig. S2** Second derivative spectra of BSFL protein dispersions subjected to MTG treatment for different durations
